# Supplementary material
Source: Springer Nature journal article supplement (https://www.springermedizin.de/resource/supplementary/12958_2014_1225_MOESM1_ESM.pdf/9567100)
Supplement: MOESM1 [file 9567100]

**A**

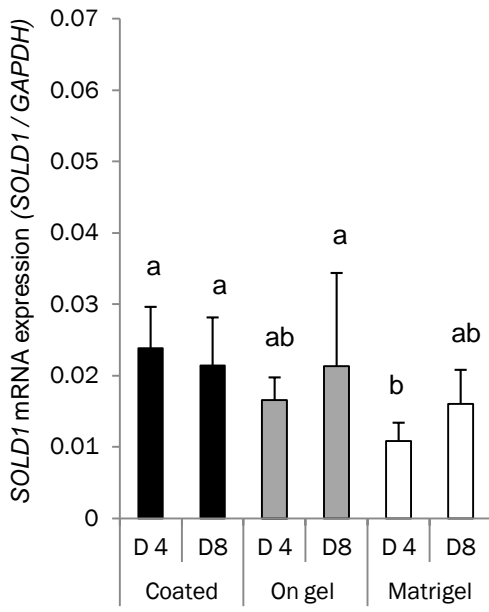

BT-C

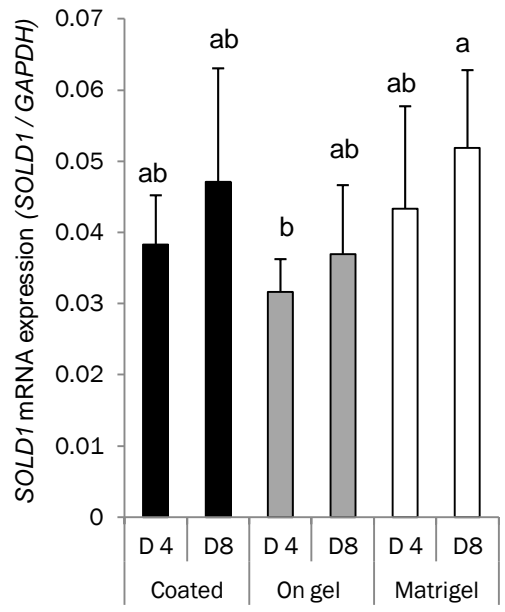

BT-K

**B**

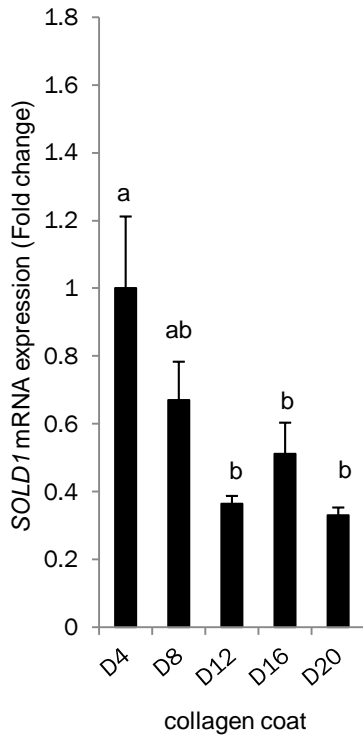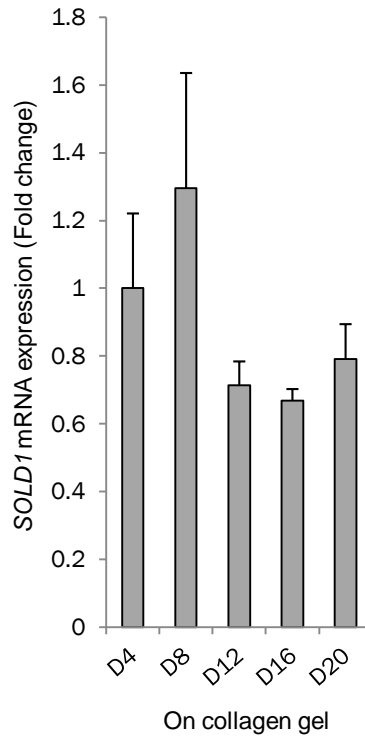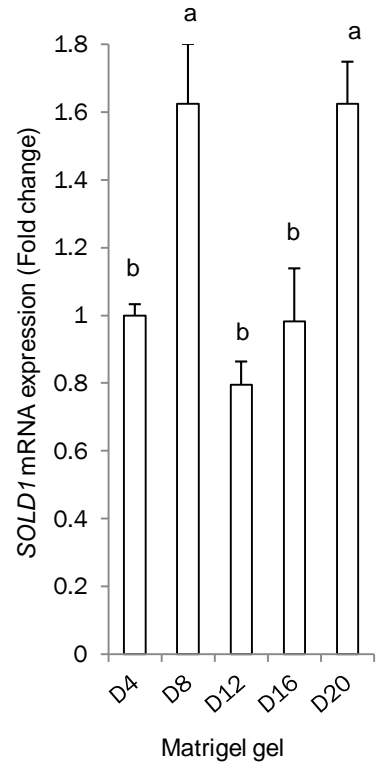

BT-C
